# 1 **Arboviruses in Kenya: A Systematic Review and Meta-analysis of Prevalence**

2 Lynn J Kirwa\*<sup>1,2</sup>, Hussein M. Abkallo<sup>1</sup>, Richard Nyamota<sup>1</sup>, Enock Kiprono<sup>1</sup>, Dishon  
3 Muloi<sup>1,3</sup>, James Akoko<sup>1</sup>, Jennifer S. Lord<sup>2</sup>, Bernard Bett<sup>1</sup>

4 1. International Livestock Research Institute, Nairobi, Kenya

5 2. Liverpool School of Tropical Medicine, Liverpool, United Kingdom

6 3. Institute of Infection, Veterinary and Ecological Sciences, University of Liverpool, United  
7 Kingdom

8

9 \*Corresponding author: Lynn J Kirwa ([lynnkirwa2019@gmail.com](mailto:lynnkirwa2019@gmail.com))

10

## 11 **Abstract**

12 Arboviruses cause >700,000 human deaths annually , with Rift Valley fever (RVF), yellow  
13 fever (YF), chikungunya, and dengue outbreaks posing major public health and economic  
14 challenges in East Africa. Yet, no comprehensive studies have consolidated Kenya's historical  
15 arboviral data to support risk assessment and inform control strategies. We registered this  
16 review in PROSPERO (CRD42023407963) and searched Web of Science, PubMed, and  
17 Global Health databases for observational articles reporting prevalence from the three main  
18 arboviral families from inception until 15<sup>th</sup> March 2023. We pooled the IgG prevalence of  
19 arboviruses using a random-effects meta-analysis with a generalised linear mixed-effects  
20 model. Heterogeneity was assessed and quantified using Cochran's Q and  $I^2$  statistics and  
21 95% prediction intervals estimated. We included 65 articles (246 datapoints; 14 arboviruses)  
22 in our analysis. The pooled IgG prevalence of RVF was 16% (95% CI: 11–24%;  $I^2=70%$ ) in  
23 wildlife, 10% (95% CI: 8–13%;  $I^2=90%$ ) in livestock, and 7% (95% CI: 4–11%;  $I^2=98%$ ) in  
24 humans, with consistently high rates observed in Garissa and Tana River counties. Among

25 Aedes-borne viruses, chikungunya showed the highest prevalence (10%; 95% CI: 4–24%;  
26  $I^2=99\%$ ), followed by dengue (6%; 95% CI: 3–11%;  $I^2=98\%$ ) and YF (5%; 95% CI: 2–11%;  
27  $I^2=97\%$ ), with the highest prevalence in Busia and Kwale. West Nile virus prevalence in  
28 humans was also estimated at 9% (95% CI: 5–14%;  $I^2=93\%$ ). Overall, the Coast, Western,  
29 and Rift Valley regions were the most affected. Multiple arboviruses have historically  
30 circulated Kenya, and with the increasing pressures of climate change, urbanization, and  
31 global connectivity, the risk of outbreaks, particularly from Aedes-borne viruses, is  
32 escalating. Proactive, sustained surveillance as well as integrated public health strategies  
33 through a One Health lens are needed to mitigate these threats and protect vulnerable  
34 populations.

35

### 36 **Author Summary**

37 Infections like Rift Valley fever, dengue, chikungunya, yellow fever, and West Nile virus are  
38 major neglected tropical diseases that pose significant public health threats both in Kenya and  
39 globally. Given the conducive conditions in Kenya and the absence of a comprehensive  
40 routine surveillance system, many areas remain under-monitored, increasing the risk of  
41 undetected transmission and delayed responses, which leaves vulnerable populations at  
42 greater risk. It is therefore imperative to conduct a thorough assessment of baseline  
43 prevalence for these diseases through a systematic review and meta-analysis that consolidates  
44 and analyses existing evidence for improved public health planning. Our study provides a  
45 detailed review of historical IgG prevalence data for 14 of these diseases in Kenya,  
46 illustrating their long-standing circulation in human, livestock, and wildlife populations, as  
47 well as the heightened risk of outbreaks driven by climate change and urbanization. We  
48 emphasize the urgent need for ongoing surveillance and integrated public health strategies

49 tailored to Kenya's unique context, such as those supported by the GAI initiative, to  
50 effectively protect vulnerable populations from future outbreaks, nationally and regionally.

51

## 52 **Introduction**

53 Vector-borne diseases constitute *approximately* 17% of the estimated global burden of  
54 infectious diseases and cause >700,000 deaths annually (1,2). Arthropod-borne viruses  
55 (arboviruses) contribute substantially to this burden, with dengue virus (DENV) alone  
56 responsible for >6.5 million human infections and >7300 deaths in 2023 (3). With severe  
57 associated complications like dengue shock syndrome and long-term chikungunya disability,  
58 potential epidemiological shifts due to changes in climate and vector distribution, in addition  
59 to urbanisation, there is an urgent need for increased arboviral research and management  
60 (2,4–7). In response, WHO launched the Global Arbovirus Initiative (GAI) to build a  
61 coalition of countries and strategic multisectoral partners, to improve surveillance,  
62 prevention, and control through an integrated and coordinated approach for maximum impact  
63 in high-burden and at-risk areas (8,9). The GAI's first pillar, '*monitor risk and anticipate*'  
64 emphasizes developing a robust surveillance system that integrates current and historical data  
65 to establish baselines, and mapping risks to identify vulnerable areas. Studies on IgG exposure  
66 support these priority actions by contributing to establishing local historical baselines and  
67 improving data quality to identify areas at risk, allocate resources efficiently, and formulate  
68 innovative targeted mitigation strategies (9).

69 In Kenya, like many tropical countries, human and animal populations are vulnerable to  
70 arboviruses owing to the optimal climate that supports a wide range of vector species able to  
71 transmit arboviruses (10). Several arboviruses, both well-established and emerging, including  
72 DENV, chikungunya (CHIKV), West Nile (WNV), Rift Valley fever (RVFV), Ngari (NV)

73 and yellow fever (YFV) have been documented in the country (10–13). Furthermore, Kenya's  
74 proximity to countries reporting recurring arboviral outbreaks like Uganda, Sudan, Tanzania,  
75 and Somalia may exacerbate the risk of arboviral importation into the country through  
76 transboundary movements (14,15) Despite these irrefutable risks, Kenya lacks a  
77 comprehensive routine surveillance system to actively monitor arboviral activity across the  
78 country for timely intervention (15,16). Existing surveillance efforts in Kenya are reactive,  
79 intensifying once outbreaks are underway or through interepidemic investigations, often  
80 focusing on high-profile arboviruses and identified hotspots (17). Consequently, large parts of  
81 the country may be under-monitored, increasing the potential for undetected transmission and  
82 delayed responses, leaving vulnerable populations at greater risk. Considering the healthcare  
83 burden they and other vector-borne diseases exert, alongside their impoverishing  
84 socioeconomic ramifications (18,19), the urgency for a thorough assessment of their baseline  
85 prevalences in the country per WHO-GAIV goals cannot be overemphasised. Here, we report  
86 the findings of a systematic review and meta-analysis of IgG seroprevalence in humans,  
87 livestock, and wildlife, consolidating and analysing existing evidence on arboviral exposure  
88 across Kenya. Given Kenya's position as a regional trading, transportation and healthcare  
89 hub, our findings will contribute to national research and control efforts in addition to regional  
90 strategies for arboviral disease mitigation.

## 91 **Methods**

92 Our systematic review and meta-analysis protocol was registered in advance in the  
93 PROSPERO International Prospective Register of Systematic Reviews (CRD42023407963)  
94 and was reported according to the Preferred Reporting Items for Systematic Reviews and  
95 Meta-analyses guidelines ([S1 File](#)) (20).

## 96 **Systematic search of the literature**

97 We conducted a systematic search in PubMed (since 1946), Web of Science (since 1900), and  
98 Global Health (since 1973) databases from their inceptions to 15<sup>th</sup> March 2023. Our search  
99 syntax ([S2 File](#)) was based on keywords from the Medical Subject Headings (MeSH)  
100 database and was designed to capture all published studies reporting prevalence data for  
101 arboviral families, including *Togaviridae* (CHIKV, ONNV, Sindbis virus (SINV)),  
102 *Flaviviridae* (DENV, WNV, YFV, ZIKV, TBEV), *Bunyaviridae* (Orthobunyavirus, NV, RVFV,  
103 CCHFV), and other related viruses in Kenya. All selected articles were collated and uploaded  
104 into Rayyan QCRI (21) and filtered for duplicate records.

105 We considered cross-sectional studies, both community- and hospital-based, before, during  
106 and after reported arboviral outbreaks in Kenya. We included studies that reported prevalence  
107 of arboviruses in human, livestock and/ or wildlife populations based on serological detection  
108 of immunoglobulin G or M (IgG, IgM), viral isolation or reverse transcription–polymerase  
109 chain reaction (RT-PCR). We excluded all studies conducted outside Kenya, and any  
110 comments, conference notes, reviews and meta-analyses, case reports, and non-peer-reviewed  
111 manuscripts (21) Two (L.J.K., R.N.) reviewers independently and blindly screened the  
112 remaining articles in two stages: primary screening of the titles and abstracts, and secondary  
113 screening of full-text articles, recording reasons for exclusions (21). Disagreements were  
114 resolved by discussing with two additional independent reviewers (H.A., J.L.).

### 115 **Evaluation of the quality of studies**

116 Two reviewers (L.J.K., R.N.) independently assessed each included study's quality using the  
117 Joanna Briggs Institute System for the Unified Management, Assessment and Review of  
118 Information (JBI SUMARI) critical appraisal tool ([S3 File](#)) (22). Specifically, this appraisal  
119 was done against nine criteria encompassing elements related to sampling, population  
120 representativeness and description, sample size determination, diagnostics coverage and

121 availability, statistical analysis, and addressing low response rates (23). Disagreements were  
122 resolved by discussing with two additional independent reviewers (H.A., J.A.). Study quality  
123 was scored as high (7-10), moderate (4-6), or low (0-3), with studies rated as high and  
124 moderate considered suitable for inclusion in the meta-analysis (24–26).

125

## 126 **Data extraction**

127 Three reviewers (L.J.K., R.N., E.K.) extracted data from included studies, to a single  
128 predefined summary Excel sheet ([S4 File](#)). These data included the first author, publication  
129 year, study design, sampling method (probabilistic, non-probabilistic), sample size, arbovirus,  
130 study setting (rural, urban, peri-urban), study period, transmission period (during or between  
131 outbreaks), geographical location (county, region), population, human participant recruitment  
132 (community, health facilities), human clinical status (apparently health, febrile illness),  
133 detection assay, confirmatory test if any, and proportion of positives per total numbers tested.  
134 In publications reporting seroprevalence studies from more than one arbovirus, population,  
135 and/ or geographic locations (counties or regions), each was considered as a separate study/  
136 row of data.

## 137 **Meta-analysis of prevalence**

138 For each study where IgG data were available, we calculated IgG prevalence estimates and  
139 their corresponding 95% confidence intervals using the exact binomial method (28). We then  
140 conducted a meta-analysis of prevalence for each arbovirus using R statistical software  
141 (version 4.2.0), using the ‘meta’ package. We estimated the pooled prevalence for each  
142 arbovirus and host population using a random intercept logistic regression model with a logit  
143 link function. The magnitude of heterogeneity between studies was assessed using Cochran’s  
144 Q and quantified using the  $I^2$  statistic; with an  $I^2$  of more than 75% indicating substantial

145 heterogeneity in the studies (27). We estimated 95% prediction intervals to capture the  
146 expected range of true proportions, and used forest plots to visualise the results (28). The  
147 distribution of arbovirus IgG prevalence across different geographical locations was mapped  
148 using QGIS software (version 2.18.26) (31).

149

## 150 **Results**

### 151 **Study selection**

152 We retrieved 3085 publications and after removing 1055 duplicates, 2030 were screened by  
153 title and abstract. From these, 97 full texts were screened, resulting in 65 articles that met our  
154 inclusion criteria ([Fig. 1](#)). Thirty-seven of these articles included multiple seroprevalence  
155 studies for more than one arbovirus, population, and/or geographic location (counties or  
156 regions) and were thus considered separately for analysis, resulting in 246 datapoints. Most  
157 studies (85%, 209/246) were of high quality, with 15% (37/246) rated as moderate quality ([S5](#)  
158 [File](#)).

159

160 **Fig. 1 Study selection process based on the PRISMA flowchart. Abbreviations: n =**  
161 **number of studies.**

162

### 163 **Summary of seroprevalence studies**

164 Of the studies, 40.7% (100) reported IgG seroprevalence for RVFV, followed by DENV  
165 (15%, 37), WNV (8.9%, 22), CHIKV (8.9%, 22), YFV (6.1%, 15), ZIKV (4.5%, 11), TBEV  
166 (4.1%, 10), CCHFV (4.1%, 10), ONNV (2.8%, 7), Sindbis (SINDV) (1.2%, 3), Banzu  
167 (BANZV) (1.2%, 3), Bunyamwera (BUNYV) (1.2%, 3247), NV (0.8%, 2), and  
168 Orthobunyaviruses (0.4%, 1). Of these studies, 74.8% (n=184) focused on human  
169 populations, 14.2% (n=35) included livestock sampling and 11% (27) included wildlife.

170 Among 184 human population studies, 64.7% (n=119) sampled apparent healthy individuals,  
171 while 31.5% (58) sampled those presenting in health facilities with febrile illnesses that were  
172 confirmed as arboviruses: DENV (17), WNV (11), TBEV (7), CCHFV (5), CHIKV (5),  
173 RVFV (4), YFV (4), ZIKV (4), and Orthobunyaviruses (1). Seven (3.8%) studies were carried  
174 out in both settings. Most of the studies were cross-sectional (97.2%, 239), with the  
175 remainder being cohort (1.6%, 4) and longitudinal (1.2%, 3). Additionally, 64.2% (158/246)  
176 carried out between outbreaks with human participants recruited from either the community  
177 (119/184, 64.7%) or health facilities (65/184, 35.3%). All eight regions in Kenya were  
178 represented by at least one study (Fig. 2). Coast and Rift Valley regions region had the highest  
179 number of studies while Nairobi and Central regions had the least.

180 **Fig. 2 Number of publications reporting seroprevalence estimates by geographical**  
181 **region: RVFV (A); DENV (B); YFV (C); CHIKV (D).** Source: The base map was retrieved  
182 from <https://data.humdata.org> and modified with QGIS software version 3.36.1-Maidenhead.

183 Of the 246 studies, IgG antibodies were the most tested (41.1%, 101/246), followed by  
184 combinations of IgG and IgM (27.6%, 68/246), unspecified antibodies (15.4%, 38/246), IgM  
185 and viral RNA (4.9%, 12/246), IgG/IgM (4.5%, 11/246), IgG/IgM and viral RNA (1.2%,  
186 3/246), IgA, IgM, and IgG (1.6%, 4/246), IgM (1.6%, 4/246), and arboviral RNA (1.6%,  
187 4/246). Most arboviral diagnostic assays across the studies were serological such as ELISA  
188 (50.8%, 125/246), hemagglutination inhibition (HI; 11.4%, 28/246), plaque reduction  
189 neutralization test (PRNT; 6.9%, 17/246), and indirect immunofluorescence assay (IIFA;  
190 1.2%, 3/246) while some used molecular tests including RT-PCR (2.4%, 6/246) and  
191 sequencing (5.7%, 14/246). A few studies combined both methods, such as ELISA and PRNT  
192 (4.5%, 11/246), ELISA, PRNT, and IIFA (0.8%, 2/246), RT-PCR and sequencing (0.4%,  
193 1/246), ELISA and RT-PCR (9.8%, 24/246), and ELISA, RT-PCR, and sequencing (4.9%,



194 12/246). Among these, 22.8% (56/246) carried out further confirmatory testing: PRNT  
195 (42/246; 17.1%), virus neutralization test (VNT; 10/246; 4.1%), FRNT (3/246; 1.2%) and  
196 ELISA (1/246; 0.4%) ([S6 File](#)).

197 The studies included in our analysis were undertaken between 1966 and 2021, with the  
198 earliest eligible study published in 1970, followed by studies in 1982, 1983, and 1992,  
199 totalling to 28 studies. These studies focused on RVFV, CHIKV, CCHFV, SINV, BUNV,  
200 ZIKV, YFV, BANV and WNV. Post-2000, the next eligible study was published in 2002  
201 (n=1) and then 2007 (n=11), all focusing on RVFV. There was an increase in published  
202 studies from 2007 onwards, peaking in 2010 (n=28), 2015 (n=45) and 2020 (n=37), which  
203 coincided with RVFV and DENV outbreaks ([Fig. 3](#)). Overall, RVFV was the most  
204 consistently studied arbovirus during this entire period, with publications in all identified  
205 years except 1970 and 2012. Other arboviruses most frequently studied were CHIKV, DENV,  
206 WNV, and YFV ([S6 File](#)).

207

208 **Fig. 3 Number of publications reporting seroprevalence estimates in humans, livestock**  
209 **and/ or wildlife, for each arbovirus by publication year.**

210

211 **Reported IgG prevalence of arboviruses in Kenya**

212 **RVFV**

213 We calculated a pooled IgG seroprevalence of 7% (95% CI: 4 - 11%;  $I^2$ : 98%, number of  
214 studies: 33) and a prediction interval of 0- 62%, reflecting substantial heterogeneity among  
215 the studies in humans. Prevalence ranged from zero in Uasin Gishu (Rift Valley) in 1996 and  
216 Kilifi (Coast) in 2004 to a 40% in Nakuru (Rift Valley) in 1989 ([Fig. 4A](#)). In livestock,  
217 twenty-seven studies reported a pooled prevalence of 10% (95% CI: 8 - 13%;  $I^2$ : 90%) ([Fig.](#)

218 4B). The prediction interval ranged from 3% to 30%, with the highest prevalence observed in  
219 Garissa (North Eastern) in 2015 at 30% and the lowest in Samburu (Rift Valley) and Meru  
220 (Eastern), both at 2% in 2006. We observed an IgG seroprevalence of 16% (95% CI: 11 -  
221 24%;  $I^2$ : 70%,  $n=15$ ) in wildlife, with a prevalence range from 5% in Taita Taveta and Tana  
222 River (both in Coast) in 2007 and 2008, respectively, to 57% in Garissa (North Eastern) in  
223 2007, and a prediction interval of 4% to 51% (Fig. 4C). The most frequently sampled species  
224 were buffaloes, warthogs, oryx, waterbuck and impala.

225

226 **Fig. 42 Forest plots showing meta-analysis of prevalence for Rift Valley fever virus. A:**  
227 humans; B: livestock; and C: wildlife. The first column lists the author and year of study,  
228 followed by the area (county/region) in Kenya. Error bars represent the pooled  
229 proportions/prevalence of IgG antibodies with their 95% CIs on the log scale for each study.  
230 Diamonds indicate the combined point estimate.  $I^2$  statistics,  $\tau^2$ , and Q-test p-values are  
231 reported.

232

### 233 ***Aedes*-borne viruses**

234 Of 21 studies focusing on humans, the pooled IgG seroprevalence for DENV was 6% (95%  
235 CI: 3–11%;  $I^2 = 98\%$ ), with a prevalence range from zero in Busia (Western) in 2004 to 67% in  
236 Kwale (Coast) in 2000 and 60% in Coastal counties in 2007, and a prediction interval of zero to  
237 67% (Fig. 5A). In wildlife, specifically *Papio* (baboon) species, a pooled prevalence of 27%  
238 (95% CI: 12-49;  $I^2 = 81\%$ ) was estimated from two studies, with a prediction interval of  
239 8-61%, the highest prevalence being in Kwale (Coast) at 47% and the lowest in Kakamega  
240 (Western) at 15%, both reported in 2014.

241 We reviewed 15 studies reporting CHIKV IgG seroprevalence in humans, showing a pooled  
242 prevalence of 10% (95% CI: 4-24%;  $I^2 = 15$ ), and a prediction interval of 4-24%. Prevalence

243 ranged from 72% in Lamu (Coast) in 2004 and 67% in Busia (Western) in 2010, to a low of 1%  
244 in Nairobi (2008), Central (2007), and Kwale (Coast) in 2009 (Fig. 5B). There was an overall  
245 IgG prevalence of 5% (95% CI: 2-11%;  $I^2=97%$ ,  $n=9$ ) for YFV in human populations. The  
246 prediction interval was 4-24%, with a prevalence range from a high of 42% in Kwale (Coast)  
247 in 2000 to a low of 1% in Kilifi (Coast) and Samburu (Rift Valley), both reported in 2004  
248 (Fig. 5C). The pooled prevalence of IgG ZIKV in humans, from four studies was 2% (95%  
249 CI: 1-3%;  $I^2=0%$ ; prediction interval: 0-5%). Reported prevalences ranged from 3% in  
250 Kisumu (Nyanza) in 2011 to 1% in Nairobi and Kisumu (Nyanza) in 2009.

251

252 **Fig. 5. Forest plots showing meta-analysis of prevalence for Aedes-borne viruses. A:**  
253 **Dengue virus; B: Chikungunya virus; and C: Yellow fever virus.** The first column lists the  
254 author and year of study, followed by the area (county/region) in Kenya. Error bars represent  
255 the pooled proportions/prevalence of IgG antibodies with their 95% CIs on the log scale for  
256 each study. Diamonds indicate the combined point estimate.  $I^2$  statistics,  $\tau^2$ , and Q-test  
257 p-values are reported.

258

### 259 **Other mosquito-borne viruses**

260 Pooling data from seventeen studies on WNV IgG, we report a pooled prevalence rate of 9%  
261 (95% CI: 5-14%;  $I^2=93%$ ), with a prediction interval of 1-51%. The highest prevalence rates  
262 were in Tana River in 2009 (34%) and Kwale in 2000 (29%), both in Coast and the lowest in  
263 Samburu (Rift Valley) (1%) and Kilifi (Coast) (2%), both reported in 2020. For ONNV, an  
264 overall prevalence of 3% (95% CI: 1 - 9%;  $I^2=76%$ ;  $n=7$ ) was observed, with a prediction  
265 interval of 0- 40%, the highest prevalence being in Lamu (Coast) at 20% in 2008 and the lowest  
266 in Nairobi at 1% in 2008. From the only two studies in Rift Valley region in 2022 reporting  
267 IgG Ngari in livestock, a pooled prevalence of 38% (95% CI: 31- 46%) with a moderate

268 heterogeneity ( $I^2= 30\%$ ) was observed. The prediction interval was 31-46%, with individual  
269 prevalence rates of 31% in Kajiado and 24% in Baringo.

270

### 271 **Tick-borne viruses**

272 An overall human IgG TBEV prevalence of 7% (95% CI: 5 - 10%;  $I^2=79\%$ ) was estimated  
273 from ten studies, with a prediction interval of 2-20%, indicating moderate heterogeneity.

274 Prevalence rates ranged from 16% in Kwale (Coast) and 11% in Baringo (Rift Valley) counties

275 in 2000 and 2020, respectively, to 3% in Nandi (Rift Valley) in 2000. For CCHFV, pooled

276 estimates of IgG seroprevalence in humans were 15% (95% CI: 6–33%;  $I^2=97\%$ ;  $n=5$ ), with a

277 prediction interval of zero to 90%. The highest prevalence was reported in Baringo (Rift

278 Valley) in 2009 at 35%, while the lowest was 3% in a nationwide study in 2020. In livestock

279 and wildlife, we report pooled CCHFV prevalence rates of 28% (95% CI: 21–36%;  $I^2=0\%$ ;

280  $n=1$ ) in Laikipia and Narok counties in Rift Valley, and 75% (95% CI: 69–81%;  $I^2=0\%$ ;  $n=1$ )

281 in Meru (Eastern) and Laikipia, Narok, Nakuru counties in Rift Valley, all reported in 2007.

282

### 283 **Discussion**

284 Our systematic review and meta-analysis, provide insights into the historical occurrence of 14

285 arboviruses in humans and animals. We focus on RVFV, DENV, CHIKV, YFV, and WNV due

286 to their substantial prevalence and prioritization in key global initiatives like the WHO

287 Blueprint for Prioritized Diseases.

288 Our findings indicate widespread RVFV seropositivity across humans, livestock and wildlife

289 that is potentially associated with presence of competent vectors, including *Aedes*, *Culex*,

290 *Mansonia*, and *Anopheles* spp. (10,30), alongside livestock movements related to intensive

291 pastoralism, commercial and sociocultural practices (31–34). The higher seroprevalences in

292 livestock and wildlife than humans are as expected due to more frequent  
293 livestock-vector-wildlife transmission, with less common spillover to humans, but still of  
294 concern (35). A One Health approach remains vital for monitoring these dynamics and  
295 mitigating accordingly. We note that the majority of studies have been concentrated in North  
296 Eastern (Garissa, Wajir), Coast (Tana River, Kilifi, Kwale, Taita Taveta), and Rift Valley  
297 (Nakuru, Baringo). This focus likely reflects targeted research in “at-risk” areas rather than  
298 limited risk elsewhere, thus a need to expand surveillance to under-studied areas to fully  
299 capture the national risk (36) For DENV and CHIKV in humans, we report overlapping  
300 geographic distributions in Nairobi, Nyanza, Western, and coastal counties (10,30), and  
301 indicating risks of cocirculation/ coinfection, particularly in areas with abundant *Aedes aegypti*  
302 mosquitoes. High frequency of outdoor livelihood activities, including pastoralism, farming,  
303 and fishing, across much of the country could further increase exposure risk to the day-feeding  
304 vector, supporting our findings (37,38). Wildlife may play an important role in DENV  
305 transmission in forested areas such as Kwale and Kakamega, either through spillback from  
306 humans to nearby *Papio* species (16,38–40) or via enzootic transmission driven by sylvatic  
307 *Aedes aegypti formosus* (41–43). YFV’s relatively low seroprevalence herein was unexpected,  
308 especially given Kenya’s designation by WHO as a high-risk country and routine mass  
309 vaccination campaigns albeit only in high-risk counties (44,45). With Kenya’s human YFV  
310 vaccination coverage estimated at just 7%, far below WHO-recommended 80% for herd  
311 immunity (10,45,46), undetected YFV circulation in susceptible populations alongside  
312 competent *Aedes* spp. (10,30) may explain our findings. However, since the most recent  
313 data in our study is from 2017, and dynamics may have shifted, especially after the 2022  
314 outbreak, reassessing YFV prevalence is key in light of current trends. Finally, with no  
315 documented outbreaks, WNV substantial seroprevalence in humans suggests sporadic  
316 transmission likely linked to migratory birds at convergence zones or local mosquito vectors,

317 including *Culex*, *Mansonia* and *Aedes* spp (10,30,47,48).

318 Our findings illustrate a persistent, widespread risk of arboviral transmission in Kenya, one  
319 that we expect to escalate due to evolving environmental and socioeconomic conditions,  
320 including climate change, globalization, urbanization, and rapid population growth (7,49–52).  
321 With respect to climate change, heavy rainfall and flooding events influence RVFV (53–57),  
322 warmer temperatures and altered precipitation patterns for *Ae. aegypti*-mediated DENV,  
323 CHIKV, and YFV (58–62), and prolonged dry spans and droughts necessitating water storage  
324 in containers for DENV and CHIKV (62–64). As climate change intensifies these weather  
325 patterns, permissive vectors may expand their geographical range and transmission seasons,  
326 potentially exacerbating arboviral threats (49,65). Under the latest IPCC projections, Kenya  
327 and much of East Africa is expected to experience mean annual temperature increases of up to  
328 2.1°C (57) with intensified heavy rainfall events (57,66–69) and sustained or reduced drought  
329 frequency (70–73). Consequently, extensive outbreaks in established hotspots could worsen,  
330 and previously unaffected or less affected regions in Kenya may emerge as new hotspots.  
331 Mordecai et al. suggest that climate-driven shifts could create complex changes in the  
332 incidence of arboviruses and malaria, with warmer temperatures potentially favoring one over  
333 the other depending on the region (51). In Kenya, this could worsen the dual burden of  
334 arboviruses and malaria, additionally straining the health system and complicating public  
335 health efforts. Rapid, often unplanned urbanization, characterized by mushrooming slums,  
336 overcrowding and poor sanitation, provides conducive breeding conditions for *Ae. aegypti*  
337 and *Culex pipiens*, which could facilitate the rapid spread of DENV, CHIKV, ZIKV and  
338 WNV (7,74–76). This is reflected in our findings of considerable prevalence of Aedes-borne  
339 viruses in urban centers like Nairobi, Mombasa, Kisumu, Busia, and Malindi. This  
340 transmission risk may be further compounded by the urban heat island effect in Nairobi, and

341 other cities that could enhance mosquito survival and reproduction, while the urban sprawl  
342 could potentially hamper vector control measures like larval source management (77–79). As  
343 Kenya’s cities and towns continue to expand and with more than 50% of Kenyans projected  
344 to live in urban centres by 2030 (80,81), the threat of urban arbovirus outbreaks in the  
345 country is significant. Further, *Ae. albopictus*, a highly adaptable species, was recorded in  
346 Kenya’s neighbors nearly a decade ago (7,49–52) and could already be in Kenya undetected  
347 (82), raising concerns about its potential to facilitate the spread of arboviruses in both urban  
348 and rural settings, further complicating control efforts.

349 Beyond expansion of urban and peri-urban centres, deforestation, intensive pastoralism,  
350 land-use change and encroachment of human settlements into previously uninhabited areas  
351 could

352 also increase arbovirus risk by disrupting natural ecosystems and increasing human-sylvatic  
353 vector interactions (83,84). Additionally, globalization—through increased international  
354 travel, tourism and trade—compounds these risks by facilitating the movement of infected  
355 people and livestock across borders, potentially introducing new strains of arboviruses into  
356 Kenya and triggering outbreaks in previously unaffected regions (85–88). Our findings  
357 support this, with substantial representation of *Aedes*-borne viruses in the trade and  
358 tourism-intensive coastal counties of Mombasa, Kwale, Kilifi, and Lamu. This is particularly  
359 concerning for viruses like DENV and CHIKV, which have a propensity for rapid spread in  
360 new environments (89–91), and is especially relevant for coastal counties like Mombasa,  
361 where high volumes of international goods importation and tourism could also introduce  
362 invasive mosquito species like *Ae. albopictus*.

363 Mitigating these projected surging arboviral threats in Kenya requires aligning national  
364 efforts with global frameworks like the GAI, Global Vector Control Response (GVCR), and

365 WHO Regional Framework for monitoring invasive species (92–94) Kenya's surveillance  
366 infrastructure, particularly the Integrated Disease Surveillance and Response (IDSR) system,  
367 has traditionally relied on passive surveillance methods with marked successes in detecting  
368 outbreaks like cholera and malaria (95,96). It is, however, often limited by underreporting  
369 and delays, limiting its capacity to fully monitor arboviral activity across the country (97)  
370 Further, deficiencies in diagnostic capacities, data integration across human, animal, vector  
371 and environmental health sectors, and insufficient personnel training have emerged as  
372 limiting factors in Kenya's capacity for arboviral surveillance and control (98). To bridge  
373 these gaps, Kenya needs to incorporate more active surveillance methods within a One Health  
374 framework including expanding entomological surveillance, streamlining reporting  
375 mechanisms, and leveraging geographic information systems and remote sensing  
376 technologies that could improve Kenya's ability to monitor vector populations and predict  
377 outbreak hotspots before they escalate (92,99) More focus on arbovirus co-infections and  
378 their clinical outcomes is needed in Kenya, as most included studies examined single viruses  
379 at a time, despite many vectors like *Aedes* and *Culex* spp. often harbouring multiple viruses  
380 simultaneously (100). Future research should also prioritize longitudinal studies across  
381 diverse ecological zones to comprehensively assess arbovirus circulation and transmission  
382 dynamics across the country. Further, diagnostic challenges such as overlapping clinical  
383 symptoms, cross-reactivity, and persistence of antibodies among many arboviruses limit the  
384 ability of laboratories in the region to generate accurate exposure data. Incorporating more  
385 specific case definitions, along with expanding the diagnostic capabilities — accurate  
386 point-of-care diagnostics especially in remote, resource-limited settings — is key for timely  
387 outbreak detection and management (51,101).

388 With no vaccines available for most arboviruses, integrated vector management (IVM)  
389 remains the most viable approach for outbreak prevention and response (89). In Kenya,



390 existing vector control efforts, including larval source management (LSM),  
391 insecticide-treated nets (ITNs), and indoor residual spraying (IRS), were primarily developed  
392 to combat malaria and have successfully reduced its burden (102,103). Yet, this focus has left  
393 arboviruses largely neglected. To correct this imbalance while maximizing resource efficiency,  
394 Kenya can leverage these existing infrastructure and resources to control arboviruses,  
395 adopting them to specific vector needs (89). For example, while LSM and larvicides may  
396 apply across *Anopheles* (malaria) and some *Aedes* species, ITNs may be less effective due to  
397 vector biology and behavior differences (89,104) Further, given Kenya's dual burden, these  
398 arbovirus interventions should complement and not detract from malaria control achievable,  
399 for instance, by training malaria control experts in arbovirus management and securing  
400 funding agreements to prevent resource diversion from the already underfunded malaria  
401 programs (89,105) Tailoring these interventions to local contexts and scaling up through  
402 community-based approaches, including health education and promotion, environmental  
403 cleanup, and leveraging the role of gender dynamics in household-level vector control, is also  
404 critical for ensuring their sustainability and success (51,93,104,106) Additionally,  
405 strengthening these strategies through multisectoral collaboration across agriculture,  
406 environment, urban planning, education and public health, would foster a more holistic and  
407 coordinated approach to arboviral threats nationwide (106).

408 To reinforce Kenya's response to arboviral outbreaks, developing and refining targeted  
409 contingency plans is essential. Kenya has made some progress in this regard with the RVFV  
410 contingency plan, which has been periodically updated to focus on high-risk areas such as  
411 Isiolo and Wajir (107). These plans should be further adapted by pre-positioning resources in  
412 these regions, training healthcare workers in rapid response protocols, and ensuring the IDSR  
413 system is fully equipped to handle the nuances of arboviral outbreaks (108,109). Kenya can

414 also capitalize our findings to contribute to a national dedicated arbovirus dashboard— per  
415 GAI’s priority actions—as a comprehensive tool for real-time monitoring, optimal resource  
416 allocation and improved coordination during outbreaks(7,9)Further, multicountry  
417 collaborations through regional networks like the East African Community and African  
418 Union, alongside global partners through the GAI, could provide Kenya with additional  
419 resources, expertise and data to strengthen its capacity to manage local and cross-border  
420 threats, while also supporting continent-level early warning systems (7,93).

421 Our findings may however be limited by substantial heterogeneity, as sources of  
422 heterogeneity, such as varying methodologies, population characteristics, and confirmation  
423 cut-offs were not reported in many studies and could not be assessed. Additionally, our  
424 county-level data, based on sampled areas, may not fully represent local ecological and  
425 climatic diversity, necessitating caution in extrapolating findings to entire counties.  
426 Ascertainment bias may also be present, as included studies predominantly focused in  
427 identified “hotspot” areas, potentially overrepresenting them. Finally, reliance on ELISA  
428 without PRNT or RT-PCR confirmation across most studies raises concerns on results  
429 accuracy and reliability. Nonetheless, our study reveals an extensive longstanding history of  
430 arboviral circulation in Kenya, with future risks projected to increase due to ecological,  
431 environmental, and socioeconomic factors. For effective mitigation, strengthening  
432 surveillance, enhancing integrated vector management, and improving outbreak response and  
433 prevention efforts are key. By addressing these key areas through targeted interventions and  
434 regional cooperation, Kenya can better position itself to effectively manage the growing risk  
435 of arboviral diseases.

#### 436 **Contributors**

437 L.J.K. conceived the study, conducted the systematic search, and was the first reviewer for  
438 the entire study. R.N., E.K., H.A. and J.L. contributed to screening, data extraction and  
439 quality appraisal. L.J.K. and J.L. conducted the statistical analysis, and L.J.K. wrote the first  
440 draft of the manuscript with input from J.L. and H.A., B.B., J.A. and D.M. reviewed the  
441 manuscript and gave input on the statistical analysis and interpretation of results. All authors  
442 contributed to drafting and revising the manuscript.

#### 443 **Declaration of interests**

444 All authors declare no competing interests.

#### 445 **Data sharing**

446 All relevant data has been included in the manuscript and supplementary material.

#### 447 **Acknowledgements**

448 The authors express their gratitude for the funding by DTRA HDTRA11910031. D.M.M was  
449 supported by the ILRI/BMZ One Health Research, Education, Outreach and Awareness  
450 Centre (OHRECA) program. The funders had no role in study design, data collection and  
451 analysis, decision to publish, or preparation of the manuscript.

#### 452 **Supplementary materials**

#### 453 **References**

- 454 1. WHO. Vector-borne diseases [Internet]. 2020 [cited 2023 Jul 4]. Available from:  
455 <https://www.who.int/news-room/fact-sheets/detail/vector-borne-diseases>
- 456 2. Agboli E, Tomazatos A, Maiga-Ascofaré O, May J, Lühken R, Schmidt-Chanasit J, et  
457 al. Arbovirus Epidemiology: The Mystery of Unnoticed Epidemics in Ghana, West  
458 Africa. Vol. 10, Microorganisms. MDPI; 2022.

- 459 3. Marchi S, Trombetta CM, Montomoli E, Marchi S, Trombetta CM, Montomoli E.  
460 Emerging and Re-emerging Arboviral Diseases as a Global Health Problem. *Public*  
461 *Health - Emerging and Re-emerging Issues* [Internet]. 2018 Nov 5 [cited 2023 Jul 22];  
462 Available from: <https://www.intechopen.com/chapters/61770>
- 463 4. Anez G, Chancey C, Grinev A, Rios M. Dengue virus and other arboviruses: a global  
464 view of risks. *ISBT Sci Ser* [Internet]. 2012 Jul 1 [cited 2023 Jul 30];7(1):274–82.  
465 Available from: <https://onlinelibrary.wiley.com/doi/full/10.1111/j.1751-2824.2012.01602.x>
- 467 5. Higuera A, Ramírez JD. Molecular epidemiology of dengue, yellow fever, Zika and  
468 Chikungunya arboviruses: An update. *Acta Trop*. 2019 Feb 1;190:99–111.
- 469 6. Tajudeen YA, Oladipo HJ, Oladunjoye IO, Yusuf RO, Sodiq H, Omotosho AO, et al.  
470 Emerging Arboviruses of Public Health Concern in Africa: Priorities for Future  
471 Research and Control Strategies. *Challenges* [Internet]. 2022 Nov 18;13(2):60.  
472 Available from: <https://www.mdpi.com/2078-1547/13/2/60>
- 473 7. Longbottom J, Walekhwa AW, Mwingira V, Kijanga O, Mramba F, Lord JS. *Aedes*  
474 *albopictus* invasion across Africa: the time is now for cross-country collaboration and  
475 control. *Lancet Glob Health* [Internet]. 2023 Apr 1 [cited 2024 Aug 27];11(4):e623–8.  
476 Available from: <http://www.thelancet.com/article/S2214109X23000463/fulltext>
- 477 8. Wallau GL, Abanda NN, Abbud A, Abdella S, Abera A, Ahuka-Mundeke S, et al.  
478 Arbovirus researchers unite: expanding genomic surveillance for an urgent global  
479 need. *Lancet Glob Health* [Internet]. 2023 Oct 1 [cited 2024 May 6];11(10):e1501–2.  
480 Available from: <http://www.thelancet.com/article/S2214109X2300325X/fulltext>
- 481 9. WHO. Global Arbovirus Initiative: preparing for the next pandemic by tackling  
482 mosquito-borne viruses with epidemic and pandemic potential [Internet]. Geneva;  
483 2024 [cited 2024 May 6]. Available from:  
484 <https://www.who.int/initiatives/global-arbovirus-initiative>
- 485 10. Karungu S, Atoni E, Ogalo J, Mwaliko C, Agwanda B, Yuan Z, et al. Mosquitoes of  
486 Etiological Concern in Kenya and Possible Control Strategies. *Insects* 2019, Vol 10,  
487 Page 173 [Internet]. 2019 Jun 16 [cited 2023 Jul 28];10(6):173. Available from:  
488 <https://www.mdpi.com/2075-4450/10/6/173/htm>

- 489 11. LaBeaud AD, Sutherland LJ, Muiruri S, Muchiri EM, Gray LR, Zimmerman PA, et al.  
490 Arbovirus Prevalence in Mosquitoes, Kenya. *Emerg Infect Dis* [Internet]. 2011 Feb  
491 [cited 2023 Aug 12];17(2):233. Available from: [/pmc/articles/PMC3204744/](https://pubmed.ncbi.nlm.nih.gov/2204744/)
- 492 12. Mease LE, Coldren RL, Musila LA, Prosser T, Ogolla F, Ofula VO, et al.  
493 Seroprevalence and distribution of arboviral infections among rural Kenyan adults: A  
494 cross-sectional study [Internet]. Vol. 8, *Virology Journal*. 2011. Available from:  
495 <http://www.virologyj.com/content/8/1/371>
- 496 13. Kimata Y, Borus P, Nzunza R, Ofula V, Chepkorir E, Waihenya R, et al. Serological  
497 Evidence of Chikungunya Virus Infection among Suspected Measles Cases in Selected  
498 Regions of Kenya: 2008-2014. *Vector-Borne and Zoonotic Diseases*. 2020 Dec  
499 1;20(12):903–9.
- 500 14. Atoni E, Waruhiu C, Nganga S, Xia H, Yuan Z. Arboviruses of human health  
501 significance in Kenya. *Afr J Health Sci*. 2018;31(1):121–41.
- 502 15. Philbert A, Majalija S, Lyantagaye SL, Anitha P. Arbovirus Vectors of Epidemiological  
503 Concern in East Africa: A systematic review of entomological studies (1940-2020). *Afr*  
504 *J Health Sci* [Internet]. 2022 Dec 6 [cited 2023 Jul 28];35(4):496–520. Available from:  
505 <https://www.ajol.info/index.php/ajhs/article/view/237737>
- 506 16. Vu DM, Mutai N, Heath CJ, Vulule JM, Mutuku FM, Ndenga BA, et al. Unrecognized  
507 Dengue Virus Infections in Children, Western Kenya, 2014–2015. *Emerg Infect Dis*  
508 [Internet]. 2017 Nov 1 [cited 2024 Apr 27];23(11):1915. Available from:  
509 [/pmc/articles/PMC5652413/](https://pubmed.ncbi.nlm.nih.gov/3152413/)
- 510 17. Chiuya T, Villinger J, Falzon LC, Alumasa L, Amanyua F, Bastos ADS, et al. Molecular  
511 screening reveals non-uniform malaria transmission in western Kenya and absence of  
512 *Rickettsia africae* and selected arboviruses in hospital patients. *Malar J* [Internet]. 2022  
513 Dec 1 [cited 2024 Sep 16];21(1):268. Available from: [/pmc/articles/PMC9482282/](https://pubmed.ncbi.nlm.nih.gov/39482282/)
- 514 18. Bosire C, Mutuku F, Ndenga B, Nzaro M, Mwendwa K, Labeaud AD. A narrative  
515 review of dengue fever infection and epidemic activity in Kenya (2010 to 2020).  
516 *PAMJ-OH* 2023; 12:10 [Internet]. 2023 Oct 16 [cited 2024 Sep 16];12(10). Available  
517 from: <https://www.one-health.panafrican-med-journal.com/content/article/12/10/full>

- 518 19. LaBeaud AD, Sutherland LJ, Muiruri S, Muchiri EM, Gray LR, Zimmerman PA, et al.  
519 Arbovirus Prevalence in Mosquitoes, Kenya. *Emerg Infect Dis* [Internet]. 2011 Feb  
520 [cited 2024 Sep 16];17(2):233. Available from: [/pmc/articles/PMC3204744/](https://pubmed.ncbi.nlm.nih.gov/26317388/)
- 521 20. Moher D, Liberati A, Tetzlaff J, Altman DG, Altman D, Antes G, et al. Preferred  
522 reporting items for systematic reviews and meta-analyses: The PRISMA statement.  
523 Vol. 6, *PLoS Medicine*. 2009.
- 524 21. Ouzzani M, Hammady H, Fedorowicz Z, Elmagarmid A. Rayyan-a web and mobile  
525 app for systematic reviews. *Syst Rev*. 2016 Dec 5;5(1).
- 526 22. Piper C. System for the unified management, assessment, and review of information  
527 (SUMARI). Vol. 107, *Journal of the Medical Library Association*. Medical Library  
528 Association; 2019. p. 634–6.
- 529 23. Munn Z, MCLinSc SM, Lisy K, Riitano D, Tufanaru C. Methodological guidance for  
530 systematic reviews of observational epidemiological studies reporting prevalence and  
531 cumulative incidence data. *Int J Evid Based Healthc* [Internet]. 2015 Sep 1 [cited 2024  
532 Apr 27];13(3):147–53. Available from: <https://pubmed.ncbi.nlm.nih.gov/26317388/>
- 533 24. Morissette K, Tricco AC, Horsley T, Chen MH, Moher D. Blinded versus unblinded  
534 assessments of risk of bias in studies included in a systematic review. *Cochrane*  
535 *Database Syst Rev* [Internet]. 2011 Sep 7 [cited 2023 Aug 2];2011(9). Available from:  
536 [/pmc/articles/PMC7433288/](https://pubmed.ncbi.nlm.nih.gov/26317388/)
- 537 25. Sargeant JM, O'Connor AM. Scoping Reviews, Systematic Reviews, and  
538 Meta-Analysis: Applications in Veterinary Medicine. *Front Vet Sci*. 2020 Jan  
539 28;7:502756.
- 540 26. Gebremariam TT, Schallig HDFH, Mekonnen Z, Hailu A, Danquah JB. Concurrent  
541 malaria and dengue fever in (sub-Saharan) Africa: a systematic review and  
542 meta-analysis. *medRxiv* [Internet]. 2022 Jun 6 [cited 2024 Apr  
543 27];2022.05.24.22275526. Available from:  
544 <https://www.medrxiv.org/content/10.1101/2022.05.24.22275526v3>
- 545 27. Borenstein M, Higgins JPT, Hedges L V., Rothstein HR. Basics of meta-analysis: I2 is  
546 not an absolute measure of heterogeneity. *Res Synth Methods* [Internet]. 2017 Mar 1  
547 [cited 2023 Aug 2];8(1):5–18. Available from:  
548 <https://onlinelibrary.wiley.com/doi/full/10.1002/jrsm.1230>

- 549 28. Barendregt JJ, Doi SA, Lee YY, Norman RE, Vos T. Meta-analysis of prevalence. *J*  
550 *Epidemiol Community Health* [Internet]. 2013 Nov 1 [cited 2023 Aug  
551 2];67(11):974–8. Available from: <https://jech.bmj.com/content/67/11/974>
- 552 29. Salgado BB, de Jesus Maués FC, Pereira RL, Chiang JO, de Oliveira Freitas MN,  
553 Ferreira MS, et al. Prevalence of arbovirus antibodies in young healthy adult  
554 population in Brazil. *Parasit Vectors* [Internet]. 2021 Dec 1 [cited 2023 Aug  
555 22];14(1):1–11. Available from:  
556 <https://parasitesandvectors.biomedcentral.com/articles/10.1186/s13071-021-04901-4>
- 557 30. Lutomiah J, Bast J, Clark J, Richardson J, Yalwala S, Oullo D, et al. Abundance,  
558 diversity, and distribution of mosquito vectors in selected ecological regions of Kenya:  
559 public health implications. *Journal of Vector Ecology* [Internet]. 2013 Jun 1 [cited  
560 2024 Apr 16];38(1):134–42. Available from:  
561 <https://onlinelibrary.wiley.com/doi/full/10.1111/j.1948-7134.2013.12019.x>
- 562 31. Anyangu AS, Gould LH, Sharif SK, Nguku PM, Omolo JO, Mutonga D, et al. Risk  
563 factors for severe Rift Valley fever infection in Kenya, 2007. *Am J Trop Med Hyg*  
564 [Internet]. 2010 Aug [cited 2024 Apr 27];83(2 Suppl):14–21. Available from:  
565 <https://pubmed.ncbi.nlm.nih.gov/20682901/>
- 566 32. Muga GO, Onyango-Ouma W, Sang R, Affognon H. Sociocultural and Economic  
567 Dimensions of Rift Valley Fever. *Am J Trop Med Hyg* [Internet]. 2015 Apr 1 [cited  
568 2024 May 5];92(4):730–8. Available from:  
569 <https://www.ajtmh.org/view/journals/tpmd/92/4/article-p730.xml>
- 570 33. Amwata DA, Nyariki DM, Musimba NRK. Factors Influencing Pastoral and  
571 Agropastoral Household Vulnerability to Food Insecurity in the Drylands of Kenya: A  
572 Case Study of Kajiado and Makeni Counties. *J Int Dev* [Internet]. 2016 Jul 1 [cited  
573 2024 May 3];28(5):771–87. Available from:  
574 <https://onlinelibrary.wiley.com/doi/full/10.1002/jid.3123>
- 575 34. Kariuki RW, Western D, Willcock S, Marchant R. Assessing Interactions between  
576 Agriculture, Livestock Grazing and Wildlife Conservation Land Uses: A Historical  
577 Example from East Africa. *Land* 2021, Vol 10, Page 46 [Internet]. 2021 Jan 6 [cited  
578 2024 May 3];10(1):46. Available from:  
579 <https://www.mdpi.com/2073-445X/10/1/46/htm>



- 580 35. Ebogo-Belobo JT, Kenmoe S, Abanda NN, Bowo-Ngandji A, Mbagu DS,  
581 Magoudjou-Pekam JN, et al. Contemporary epidemiological data of Rift Valley fever  
582 virus in humans, mosquitoes and other animal species in Africa: A systematic review  
583 and meta-analysis. *Vet Med Sci* [Internet]. 2023 [cited 2023 Aug 28]; Available from:  
584 <https://onlinelibrary.wiley.com/doi/full/10.1002/vms3.1238>
- 585 36. Salje H, Paul KK, Paul R, Rodriguez-Barraquer I, Rahman Z, Alam MS, et al.  
586 Nationally-representative serostudy of dengue in Bangladesh allows generalizable  
587 disease burden estimates. *Elife* [Internet]. 2019 [cited 2024 Sep 24];8. Available from:  
588 <https://pubmed.ncbi.nlm.nih.gov/30958263/>
- 589 37. Ferede G, Tiruneh M, Abate E, Wondimeneh Y, Damtie D, Gadisa E, et al. A serologic  
590 study of dengue in northwest Ethiopia: Suggesting preventive and control measures.  
591 *PLoS Negl Trop Dis* [Internet]. 2018 May 31 [cited 2024 May 5];12(5). Available  
592 from: [/pmc/articles/PMC5978788/](https://pubmed.ncbi.nlm.nih.gov/30958263/)
- 593 38. Ochieng C, Ahenda P, Vittor AY, Nyoka R, Gikunju S, Wachira C, et al.  
594 Seroprevalence of Infections with Dengue, Rift Valley Fever and Chikungunya Viruses  
595 in Kenya, 2007. *PLoS One* [Internet]. 2015 Jul 15 [cited 2024 May 5];10(7):132645.  
596 Available from: [/pmc/articles/PMC4503415/](https://pubmed.ncbi.nlm.nih.gov/30958263/)
- 597 39. Chowdhury S, Brown J, Swedell L. Anthropogenic effects on the physiology and  
598 behaviour of chacma baboons in the Cape Peninsula of South Africa. *Conserv Physiol*  
599 [Internet]. 2020 [cited 2024 May 3];8(1). Available from: [/pmc/articles/PMC7428446/](https://pubmed.ncbi.nlm.nih.gov/30958263/)
- 600 40. Kifle Z. Human-olive baboon (*Papio anubis*) conflict in the human-modified  
601 landscape, Wollo, Ethiopia. *Glob Ecol Conserv*. 2021 Nov 1;31:e01820.
- 602 41. Yalwala S, Clark J, Oullo D, Ngonga D, Abuom D, Wanja E, et al. Comparative  
603 efficacy of existing surveillance tools for *Aedes aegypti* in Western Kenya. *Journal of*  
604 *Vector Ecology* [Internet]. 2015 Dec 1 [cited 2024 Apr 15];40(2):301–7. Available  
605 from: <https://onlinelibrary.wiley.com/doi/full/10.1111/jvec.12168>
- 606 42. McBride CS, Baier F, Omondi AB, Spitzer SA, Lutomiah J, Sang R, et al. Evolution of  
607 mosquito preference for humans linked to an odorant receptor. *Nature* 2014 515:7526  
608 [Internet]. 2014 Nov 12 [cited 2024 Apr 18];515(7526):222–7. Available from:  
609 <https://www.nature.com/articles/nature13964>



- 610 43. Trpis M, Hausermann W. Demonstration of differential domesticity of *Aedes aegypti*  
611 (L.) (Diptera, Culicidae) in Africa by mark-release-recapture. *Bull Entomol Res*  
612 [Internet]. 1975 [cited 2024 Apr 25];65(2):199–208. Available from:  
613 [https://www.cambridge.org/core/journals/bulletin-of-entomological-research/article/ab](https://www.cambridge.org/core/journals/bulletin-of-entomological-research/article/abs/demonstration-of-differential-domesticity-of-aedes-aegypti-l-diptera-culicidae-in-africa-by-markreleaserecapture/BE254383B7D369295031265FE56D4464)  
614 [s/demonstration-of-differential-domesticity-of-aedes-aegypti-l-diptera-culicidae-in-afri](https://www.cambridge.org/core/journals/bulletin-of-entomological-research/article/abs/demonstration-of-differential-domesticity-of-aedes-aegypti-l-diptera-culicidae-in-africa-by-markreleaserecapture/BE254383B7D369295031265FE56D4464)  
615 [ca-by-markreleaserecapture/BE254383B7D369295031265FE56D4464](https://www.cambridge.org/core/journals/bulletin-of-entomological-research/article/abs/demonstration-of-differential-domesticity-of-aedes-aegypti-l-diptera-culicidae-in-africa-by-markreleaserecapture/BE254383B7D369295031265FE56D4464)
- 616 44. Yellow Fever - Kenya [Internet]. [cited 2024 Sep 18]. Available from:  
617 <https://www.who.int/emergencies/disease-outbreak-news/item/2022-DON361>
- 618 45. WHO. Yellow Fever – Kenya [Internet]. 2016 [cited 2023 Jul 22]. Available from:  
619 [https://www.who.int/emergencies/disease-outbreak-news/item/6-april-2016-yellow-fev](https://www.who.int/emergencies/disease-outbreak-news/item/6-april-2016-yellow-fever-kenya-en)  
620 [er-kenya-en](https://www.who.int/emergencies/disease-outbreak-news/item/6-april-2016-yellow-fever-kenya-en)
- 621 46. Lutomiah J, Bast J, Clark J, Richardson J, Yalwala S, Oullo D, et al. Abundance,  
622 diversity, and distribution of mosquito vectors in selected ecological regions of Kenya:  
623 public health implications. *Journal of Vector Ecology* [Internet]. 2013 Jun 1 [cited  
624 2024 Apr 15];38(1):134–42. Available from:  
625 <https://onlinelibrary.wiley.com/doi/full/10.1111/j.1948-7134.2013.12019.x>
- 626 47. Nyamwaya D, Wang’ondv V, Amimo J, Michuki G, Ogugo M, Ontiri E, et al.  
627 Detection of West Nile virus in wild birds in Tana River and Garissa Counties, Kenya.  
628 *BMC Infect Dis*. 2016 Nov 23;16(1).
- 629 48. Ochieng C, Lutomiah J, Makio A, Koka H, Chepkorir E, Yalwala S, et al.  
630 Mosquito-borne arbovirus surveillance at selected sites in diverse ecological zones of  
631 Kenya; 2007–2012. *Virology*. 2013;10:1–10.
- 632 49. Liang G, Gao X, Gould EA. Factors responsible for the emergence of arboviruses;  
633 strategies, challenges and limitations for their control. *Emerg Microbes Infect*  
634 [Internet]. 2015 Mar 25 [cited 2024 Aug 28];4(3). Available from:  
635 <https://www.tandfonline.com/doi/abs/10.1038/emi.2015.18>
- 636 50. Sukhralia S, Verma M, Gopirajan S, Dhanaraj PS, Lal R, Mehla N, et al. From dengue  
637 to Zika: the wide spread of mosquito-borne arboviruses. *European Journal of Clinical*  
638 *Microbiology and Infectious Diseases* [Internet]. 2019 Jan 22 [cited 2024 Aug  
639 28];38(1):3–14. Available from:  
640 <https://link.springer.com/article/10.1007/s10096-018-3375-7>

- 641 51. Mordecai EA, Ryan SJ, Caldwell JM, Shah MM, LaBeaud AD. Climate change could  
642 shift disease burden from malaria to arboviruses in Africa. *Lancet Planet Health*  
643 [Internet]. 2020 Sep 1 [cited 2023 Aug 10];4(9):e416–23. Available from:  
644 <http://www.thelancet.com/article/S2542519620301789/fulltext>
- 645 52. Lim AY, Jafari Y, Caldwell JM, Clapham HE, Gaythorpe KAM, Hussain-Alkhateeb L,  
646 et al. A systematic review of the data, methods and environmental covariates used to  
647 map Aedes-borne arbovirus transmission risk. *BMC Infect Dis* [Internet]. 2023 Dec 1  
648 [cited 2024 Aug 27];23(1):1–18. Available from:  
649 <https://bmcinfectdis.biomedcentral.com/articles/10.1186/s12879-023-08717-8>
- 650 53. Oyas H, Holmstrom L, Kemunto NP, Muturi M, Mwatondo A, Osoro E, et al.  
651 Enhanced surveillance for Rift Valley Fever in livestock during El Niño rains and  
652 threat of RVF outbreak, Kenya, 2015-2016. *PLoS Negl Trop Dis* [Internet]. 2018 Apr  
653 26 [cited 2023 Aug 9];12(4). Available from: [/pmc/articles/PMC5919633/](https://pubmed.ncbi.nlm.nih.gov/32748778/)
- 654 54. Munyua P, Murithi RM, Wainwright S, Githinji J, Hightower A, Mutonga D, et al. Rift  
655 Valley fever outbreak in livestock in Kenya, 2006-2007. *Am J Trop Med Hyg*  
656 [Internet]. 2010 Aug [cited 2023 Aug 12];83(2 Suppl):58–64. Available from:  
657 <https://pubmed.ncbi.nlm.nih.gov/20682907/>
- 658 55. Hassan A, Muturi M, Mwatondo A, Omolo J, Bett B, Gikundi S, et al. Epidemiological  
659 Investigation of a Rift Valley Fever Outbreak in Humans and Livestock in Kenya,  
660 2018. *Am J Trop Med Hyg* [Internet]. 2020 Oct 1 [cited 2024 Apr 27];103(4):1649–55.  
661 Available from: <https://pubmed.ncbi.nlm.nih.gov/32748778/>
- 662 56. Nguku PM, Sharif SK, Mutonga D, Amwayi S, Omolo J, Mohammed O, et al. An  
663 investigation of a major outbreak of Rift Valley fever in Kenya: 2006-2007. *Am J Trop*  
664 *Med Hyg* [Internet]. 2010 Aug [cited 2024 Apr 27];83(2 Suppl):5–13. Available from:  
665 <https://pubmed.ncbi.nlm.nih.gov/20682900/>
- 666 57. Africa. *Climate Change 2022 – Impacts, Adaptation and Vulnerability* [Internet]. 2023  
667 Jun 22 [cited 2024 Sep 17];1285–456. Available from:  
668 [https://www.cambridge.org/core/product/identifier/9781009325844%23c9/type/book\\_](https://www.cambridge.org/core/product/identifier/9781009325844%23c9/type/book_part)  
669 [part](https://www.cambridge.org/core/product/identifier/9781009325844%23c9/type/book_part)
- 670 58. Wilder-Smith A, Monath TP. Responding to the threat of urban yellow fever outbreaks.  
671 *Lancet Infect Dis*. 2017 Mar 1;17(3):248–50.

- 672 59. Sang RC, Dunster LM. The growing threat of arbovirus transmission and outbreaks in  
673 Kenya: a review. *East Afr Med J* [Internet]. 2001 [cited 2023 Aug 10];78(12):655–61.  
674 Available from: <https://pubmed.ncbi.nlm.nih.gov/12199448/>
- 675 60. Uwishema O, Eneh SC, Chiburoma AG, Fadl Elhassan WA, Abdur-Rahman Adekunle  
676 A, Rogose MS, et al. Yellow fever outbreak in Kenya: A review. *Annals of Medicine  
677 and Surgery* [Internet]. 2022 Oct 1 [cited 2023 Aug 22];82:104537. Available from:  
678 </pmc/articles/PMC9577449/>
- 679 61. Lutomiah J, Barrera R, Makio A, Mutisya J, Koka H, Owaka S, et al. Dengue Outbreak  
680 in Mombasa City, Kenya, 2013–2014: Entomologic Investigations. *PLoS Negl Trop  
681 Dis* [Internet]. 2016 Oct 26 [cited 2023 Jul 30];10(10):e0004981. Available from:  
682 <https://journals.plos.org/plosntds/article?id=10.1371/journal.pntd.0004981>
- 683 62. Ellis EM, Neatherlin JC, Delorey M, Ochieng M, Mohamed AH, Mogeni DO, et al. A  
684 Household Serosurvey to Estimate the Magnitude of a Dengue Outbreak in Mombasa,  
685 Kenya, 2013. *PLoS Negl Trop Dis*. 2015 Apr 29;9(4).
- 686 63. Obonyo M, Fidhow A, Ofula V. Investigation of laboratory confirmed Dengue  
687 outbreak in North-eastern Kenya, 2011. *PLoS One* [Internet]. 2018 Jun 1 [cited 2024  
688 Apr 27];13(6):e0198556. Available from:  
689 <https://journals.plos.org/plosone/article?id=10.1371/journal.pone.0198556>
- 690 64. Konongoi SL, Nyunja A, Ofula V, Owaka S, Koka H, Koskei E, et al. Human and  
691 entomologic investigations of chikungunya outbreak in Mandera, Northeastern Kenya,  
692 2016. *PLoS One* [Internet]. 2018 Oct 1 [cited 2024 Apr 27];13(10):e0205058.  
693 Available from:  
694 <https://journals.plos.org/plosone/article?id=10.1371/journal.pone.0205058>
- 695 65. Robert MA, Stewart-Ibarra AM, Estallo EL. Climate change and viral emergence:  
696 evidence from Aedes-borne arboviruses. *Curr Opin Virol* [Internet]. 2020 Feb 1 [cited  
697 2024 Aug 29];40:41. Available from: </pmc/articles/PMC7305058/>
- 698 66. Nikulin G, Lennard C, Dosio A, Kjellström E, Chen Y, Hansler A, et al. The effects of  
699 1.5 and 2 degrees of global warming on Africa in the CORDEX ensemble.  
700 *Environmental Research Letters* [Internet]. 2018 May 25 [cited 2024 Sep  
701 17];13(6):065003. Available from:  
702 <https://iopscience.iop.org/article/10.1088/1748-9326/aab1b1>

- 703 67. Ogega OM, Koske J, Kung'u JB, Scoccimarro E, Endris HS, Mistry MN. Heavy  
704 precipitation events over East Africa in a changing climate: results from CORDEX  
705 RCMs. *Clim Dyn* [Internet]. 2020 Aug 1 [cited 2024 Sep 17];55(3–4):993–1009.  
706 Available from:  
707 <https://link-springer-com-443.webvpn.synu.edu.cn/article/10.1007/s00382-020-05309->  
708 [z](https://link-springer-com-443.webvpn.synu.edu.cn/article/10.1007/s00382-020-05309-z)
- 709 68. Finney DL, Marsham JH, Rowell DP, Kendon EJ, Tucker SO, Stratton RA, et al.  
710 Effects of Explicit Convection on Future Projections of Mesoscale Circulations,  
711 Rainfall, and Rainfall Extremes over Eastern Africa. *J Clim* [Internet]. 2020 Apr 1  
712 [cited 2024 Sep 17];33(7):2701–18. Available from:  
713 <https://journals.ametsoc.org/view/journals/clim/33/7/jcli-d-19-0328.1.xml>
- 714 69. Li C, Zwiers F, Zhang X, Li G, Sun Y, Wehner M. Changes in Annual Extremes of  
715 Daily Temperature and Precipitation in CMIP6 Models. *J Clim* [Internet]. 2021 May 1  
716 [cited 2024 Sep 17];34(9):3441–60. Available from:  
717 <https://journals.ametsoc.org/view/journals/clim/34/9/JCLI-D-19-1013.1.xml>
- 718 70. Liu W, Sun F, Ho Lim W, Zhang J, Wang H, Shiogama H, et al. Global drought and  
719 severe drought-Affected populations in 1.5 and 2°C warmer worlds.  
720 *Earth System Dynamics*. 2018 Mar 19;9(1):267–83.
- 721 71. Haile GG, Tang Q, Hosseini-Moghari SM, Liu X, Gebremicael TG, Leng G, et al.  
722 Projected Impacts of Climate Change on Drought Patterns Over East Africa. *Earths*  
723 *Future* [Internet]. 2020 Jul 1 [cited 2024 Sep 17];8(7):e2020EF001502. Available  
724 from: <https://onlinelibrary.wiley.com/doi/full/10.1029/2020EF001502>
- 725 72. Nguvava M, Abiodun BJ, Otieno F. Projecting drought characteristics over East  
726 African basins at specific global warming levels. *Atmos Res*. 2019 Nov 1;228:41–54.
- 727 73. Spinoni J, Barbosa P, Bucchignani E, Cassano J, Cavazos T, Christensen JH, et al.  
728 Future global meteorological drought hot spots: A study based on CORDEX data. *J*  
729 *Clim*. 2020 May 1;33(9):3635–61.
- 730 74. Kolimenakis A, Heinz S, Wilson ML, Winkler V, Yakob L, Michaelakis A, et al. The  
731 role of urbanisation in the spread of *Aedes* mosquitoes and the diseases they  
732 transmit—A systematic review. *PLoS Negl Trop Dis* [Internet]. 2021 Sep 1 [cited 2024  
733 Aug 27];15(9). Available from: [/pmc/articles/PMC8428665/](https://pubmed.ncbi.nlm.nih.gov/3428665/)

- 734 75. Agha SB, Tchouassi DP. Urbanization of *Aedes* mosquito populations and evolution of  
735 arboviral disease risk in Africa. *Curr Opin Insect Sci*. 2022 Dec 1;54:100988.
- 736 76. Giesen C, Herrador Z, Fernandez-Martinez B, Figuerola J, Gangoso L, Vazquez A, et  
737 al. A systematic review of environmental factors related to WNV circulation in  
738 European and Mediterranean countries. *One Health*. 2023 Jun 1;16:100478.
- 739 77. Almeida LS, Cota ALS, Rodrigues DF. Sanitation, Arboviruses, and Environmental  
740 Determinants of Disease: impacts on urban health. *Cien Saude Colet*.  
741 2020;25:3857–68.
- 742 78. Ochola EM, Fakharizadehshirazi E, Adimo AO, Mukundi JB, Wesonga JM, Sodoudi S.  
743 Inter-local climate zone differentiation of land surface temperatures for Management  
744 of Urban Heat in Nairobi City, Kenya. *Urban Clim*. 2020 Mar 1;31:100540.
- 745 79. de Azevedo TS, Bourke BP, Piovezan R, Sallum MAM. The influence of urban heat  
746 Islands and socioeconomic factors on the spatial distribution of *Aedes aegypti* larval  
747 habitats. *Geospat Health*. 2018 May 7;13(1):179–87.
- 748 80. Urbanization in Kenya: Building inclusive & sustainable cities [Internet]. [cited 2024  
749 Aug 28]. Available from: <https://unhabitat.org/kenya>
- 750 81. Owino EA. *Aedes* spp mosquitoes and emerging neglected diseases of Kenya. *Int J*  
751 *Mosq Res*. 2018;5(5):1–11.
- 752 82. Oliveira S, Capinha C, Rocha J. Predicting the time of arrival of the Tiger mosquito  
753 (*Aedes albopictus*) to new countries based on trade patterns of tyres and plants. *Journal*  
754 *of Applied Ecology* [Internet]. 2023 Nov 1 [cited 2024 Aug 28];60(11):2362–74.  
755 Available from: <https://onlinelibrary.wiley.com/doi/full/10.1111/1365-2664.14503>
- 756 83. Eastwood G, Sang RC, Guerbois M, Taracha ELN, Weaver SC. Enzootic circulation of  
757 chikungunya virus in East Africa: Serological evidence in non-human Kenyan  
758 primates. *American Journal of Tropical Medicine and Hygiene*. 2017;97(5):1399–404.
- 759 84. Eastwood G, Sang RC, Lutomia J, Tunge P, Weaver SC. Sylvatic Mosquito Diversity  
760 in Kenya—Considering Enzootic Ecology of Arboviruses in an Era of Deforestation.  
761 *Insects* 2020, Vol 11, Page 342 [Internet]. 2020 Jun 3 [cited 2024 Aug 28];11(6):342.  
762 Available from: <https://www.mdpi.com/2075-4450/11/6/342/htm>
- 763 85. Salkeld D, Hopkins S, Hayman D. Emerging infectious diseases and  
764 globalization—travel, trade, and invasive species. *Emerging Zoonotic and Wildlife*

- 765 Pathogens [Internet]. 2023 Dec 14 [cited 2024 Aug 29];175–98. Available from:  
766 <https://academic.oup.com/book/55315/chapter/428751306>
- 767 86. Mayer S V., Tesh RB, Vasilakis N. The emergence of arthropod-borne viral diseases: A  
768 global prospective on dengue, chikungunya and zika fevers. *Acta Trop* [Internet]. 2017  
769 Feb 1 [cited 2023 Jul 30];166:155–63. Available from:  
770 <https://pubmed.ncbi.nlm.nih.gov/27876643/>
- 771 87. Girard M, Nelson CB, Picot V, Gubler DJ. Arboviruses: A global public health threat.  
772 *Vaccine* [Internet]. 2020 May 5 [cited 2024 Aug 29];38(24):3989. Available from:  
773 </pmc/articles/PMC7180381/>
- 774 88. Braack L, Gouveia De Almeida AP, Cornel AJ, Swanepoel R, De Jager C.  
775 Mosquito-borne arboviruses of African origin: review of key viruses and vectors.  
776 *Parasites & Vectors* 2018 11:1 [Internet]. 2018 Jan 9 [cited 2023 Jul 31];11(1):1–26.  
777 Available from:  
778 <https://parasitesandvectors.biomedcentral.com/articles/10.1186/s13071-017-2559-9>
- 779 89. Weetman D, Kamgang B, Badolo A, Moyes CL, Shearer FM, Coulibaly M, et al.  
780 *Aedes* Mosquitoes and *Aedes*-Borne Arboviruses in Africa: Current and Future  
781 Threats. *International Journal of Environmental Research and Public Health* 2018, Vol  
782 15, Page 220 [Internet]. 2018 Jan 28 [cited 2023 Jul 31];15(2):220. Available from:  
783 <https://www.mdpi.com/1660-4601/15/2/220/htm>
- 784 90. Espinal MA, Andrus JK, Jauregui B, Waterman SH, Morens DM, Santos JI, et al.  
785 Emerging and Reemerging *Aedes*-Transmitted Arbovirus Infections in the Region of  
786 the Americas: Implications for Health Policy. *Am J Public Health* [Internet]. 2019  
787 [cited 2023 Aug 21];109(3):387. Available from: </pmc/articles/PMC6366516/>
- 788 91. Kraemer MUG, Sinka ME, Duda KA, Mylne AQN, Shearer FM, Barker CM, et al.  
789 The global distribution of the arbovirus vectors *Aedes aegypti* and *Ae. Albopictus*.  
790 *Elife*. 2015 Jun 30;4(JUNE2015).
- 791 92. Balakrishnan VS. WHO launches global initiative for arboviral diseases. *Lancet*  
792 *Microbe* [Internet]. 2022 Jun 1 [cited 2024 Sep 5];3(6):e407. Available from:  
793 <http://www.thelancet.com/article/S2666524722001306/fulltext>
- 794 93. World Health Organization. Global vector control response 2017–2030. Geneva; 2017.



- 795 94. van den Berg H, Velayudhan R, Ejov M. Regional framework for surveillance and  
796 control of invasive mosquito vectors and re-emerging vector-borne diseases:  
797 2014–2020. In: Regional framework for surveillance and control of invasive mosquito  
798 vectors and re-emerging vector-borne diseases: 2014–2020. 2013.
- 799 95. MOH. 3rd Edition IDSR Technical Guidelines. 2022.
- 800 96. Geteri F, Dawa J, Gachohi J, State W, Kenya U, Kadivane S, et al. A recent history of  
801 disease outbreaks in Kenya, 2007-2022: Findings from routine surveillance data. 2024  
802 Mar 21 [cited 2024 Sep 6]; Available from: <https://www.researchsquare.com>
- 803 97. Kahariri S, Thumbi SM, Bett B, Mureithi MW, Nyaga N, Ogendo A, et al. The  
804 evolution of Kenya’s animal health surveillance system and its potential for efficient  
805 detection of zoonoses. *Front Vet Sci* [Internet]. 2024 [cited 2024 Sep 6];11:1379907.  
806 Available from: [/pmc/articles/PMC11223174/](https://pubmed.ncbi.nlm.nih.gov/411223174/)
- 807 98. WHO. Surveillance and control of arboviral diseases in the WHO African Region  
808 assessment of country capacities. Geneva; 2022.
- 809 99. Biu PW, Nwasike CN, Tula OA, Ezeigweneme CA, Gidiagba JO, Biu PW, et al. A  
810 review of GIS applications in public health surveillance.  
811 <https://wjarr.com/sites/default/files/WJARR-2023-2684.pdf> [Internet]. 2024 Jan 30  
812 [cited 2024 Sep 6];21(1):030–9. Available from:  
813 <https://wjarr.com/content/review-gis-applications-public-health-surveillance>
- 814 100. Vogels CBF, Rückert C, Cavany SM, Perkins TA, Ebel GD, Grubaugh ND. Arbovirus  
815 coinfection and co-transmission: A neglected public health concern? *PLoS Biol*  
816 [Internet]. 2019 [cited 2024 Oct 9];17(1). Available from: [/pmc/articles/PMC6358106/](https://pubmed.ncbi.nlm.nih.gov/36358106/)
- 817 101. Varghese J, De Silva I, Millar DS. Latest Advances in Arbovirus Diagnostics.  
818 *Microorganisms* 2023, Vol 11, Page 1159 [Internet]. 2023 Apr 28 [cited 2024 Sep  
819 5];11(5):1159. Available from: <https://www.mdpi.com/2076-2607/11/5/1159/htm>
- 820 102. Ng’ang’a PN, Aduogo P, Mutero CM. Strengthening community and stakeholder  
821 participation in the implementation of integrated vector management for malaria  
822 control in western Kenya: a case study. *Malar J* [Internet]. 2021 Dec 1 [cited 2024 Sep  
823 6];20(1):1–14. Available from:  
824 <https://malariajournal.biomedcentral.com/articles/10.1186/s12936-021-03692-4>

- 825 103. Mutero CM, Mbogo C, Mwangangi J, Imbahale S, Kibe L, Orindi B, et al. An  
826 Assessment of Participatory Integrated Vector Management for Malaria Control in  
827 Kenya. *Environ Health Perspect* [Internet]. 2015 Nov 1 [cited 2023 Aug  
828 22];123(11):1145–51. Available from:  
829 <https://ehp.niehs.nih.gov/doi/10.1289/ehp.1408748>
- 830 104. Buchwald AG, Hayden MH, Dadzie SK, Paull SH, Carlton EJ. Aedes-borne disease  
831 outbreaks in West Africa: A call for enhanced surveillance. *Acta Trop* [Internet]. 2020  
832 Sep 1 [cited 2024 Sep 5];209. Available from:  
833 <https://pubmed.ncbi.nlm.nih.gov/32416077/>
- 834 105. Dzul-Manzanilla F, Ibarra-López J, Marín WB, Martini-Jaimes A, Leyva JT,  
835 Correa-Morales F, et al. Indoor Resting Behavior of *Aedes aegypti* (Diptera: Culicidae)  
836 in Acapulco, Mexico. *J Med Entomol* [Internet]. 2017 Mar 1 [cited 2024 Sep  
837 6];54(2):501–4. Available from: <https://pubmed.ncbi.nlm.nih.gov/28011725/>
- 838 106. WHO. Meeting of programme managers and the Regional Technical Advisory Group  
839 on dengue and other arboviruses in the South-East Asia Region. . New Delhi; 2024.
- 840 107. Zoonotic Disease Unit. National Contingency Plan for Rift Valley Fever. Nairobi;  
841 2014.
- 842 108. Ng’etichi AKS, Voyi K, Kirinyet RC, Mutero CM. A systematic review on improving  
843 implementation of the revitalised integrated disease surveillance and response system  
844 in the African region: A health workers’ perspective. *PLoS One* [Internet]. 2021 Mar 1  
845 [cited 2024 Sep 6];16(3). Available from: [/pmc/articles/PMC7978283/](https://pubmed.ncbi.nlm.nih.gov/35488883/)
- 846 109. Wolfe CM, Hamblion EL, Dzotsi EK, Mboussou F, Eckerle I, Flahault A, et al.  
847 Systematic review of Integrated Disease Surveillance and Response (IDSR)  
848 implementation in the African region. *PLoS One* [Internet]. 2021 Feb 1 [cited 2024  
849 Sep 6];16(2). Available from: [/pmc/articles/PMC7906422/](https://pubmed.ncbi.nlm.nih.gov/34888883/)
- 850
