# Supplementary material for: Arboviruses in Kenya: A Systematic Review and Meta-analysis of Prevalence
Source: bioRxiv or medRxiv preprint supplement (doi:10.1101/2024.10.17.24315511), 2024-10-18
Supplement: Supplementary file [file media-2.pdf]

## LITERATURE SEARCH

**Search Date: 15/03/2024**

### PubMed

| Query | Syntax                                                                                                                                                                                                                                                                                                                                                                                                                                                                                                                                                                                                         | Hits       |
|-------|----------------------------------------------------------------------------------------------------------------------------------------------------------------------------------------------------------------------------------------------------------------------------------------------------------------------------------------------------------------------------------------------------------------------------------------------------------------------------------------------------------------------------------------------------------------------------------------------------------------|------------|
| #1    | Epidemiology OR Prevalence OR Seroprevalence OR Distribution OR Risk factors OR Seroepidemiology OR Surveillance                                                                                                                                                                                                                                                                                                                                                                                                                                                                                               | 5,807,793  |
| #2    | Vector-borne Virus* OR Arthropod-borne OR Arthropod-borne Virus* OR Mosquito-borne Virus* OR Aedes OR Culex OR Anopheles OR Tick-borne Virus* OR Arbovir* OR Yellow fever OR YF OR Rift Valley Fever Virus OR RVFV OR Dengue OR DENV OR Chikungunya OR CHIKV OR Zika OR West Nile Virus OR WNV OR Crimean-Congo Hemorrhagic Fever OR CCHF OR Mayaro Virus* OR O'nyong' nyong OR O'nyong' nyong OR O'nyong nyong OR ONNV OR Thogoto OR Nairobi Sheep Disease OR Tick-borne Encephalitis Virus* OR Bunyavir* OR Alphavir* OR Flavivir* OR Phlebovir* OR Nairovir* OR Togovir* OR Orthomyxovir* OR Orthobunyavir* | 143,297    |
| #3    | Kenya                                                                                                                                                                                                                                                                                                                                                                                                                                                                                                                                                                                                          | 41,358     |
| #4    | <b>#1 AND #2 AND #3</b>                                                                                                                                                                                                                                                                                                                                                                                                                                                                                                                                                                                        | <b>928</b> |

### Global Health

| Query | Syntax                                                                                                                                                                                                                                                                                                                                                                                                                                                                                                                                                                                                         | Hits       |
|-------|----------------------------------------------------------------------------------------------------------------------------------------------------------------------------------------------------------------------------------------------------------------------------------------------------------------------------------------------------------------------------------------------------------------------------------------------------------------------------------------------------------------------------------------------------------------------------------------------------------------|------------|
| #1    | Epidemiology OR Prevalence OR Seroprevalence OR Distribution OR Risk factors OR Seroepidemiology OR Surveillance                                                                                                                                                                                                                                                                                                                                                                                                                                                                                               | 1,092,679  |
| #2    | Vector-borne Virus* OR Arthropod-borne OR Arthropod-borne Virus* OR Mosquito-borne Virus* OR Aedes OR Culex OR Anopheles OR Tick-borne Virus* OR Arbovir* OR Yellow fever OR YF OR Rift Valley Fever Virus OR RVFV OR Dengue OR DENV OR Chikungunya OR CHIKV OR Zika OR West Nile Virus OR WNV OR Crimean-Congo Hemorrhagic Fever OR CCHF OR Mayaro Virus* OR O'nyong' nyong OR O'nyong' nyong OR O'nyong nyong OR ONNV OR Thogoto OR Nairobi Sheep Disease OR Tick-borne Encephalitis Virus* OR Bunyavir* OR Alphavir* OR Flavivir* OR Phlebovir* OR Nairovir* OR Togovir* OR Orthomyxovir* OR Orthobunyavir* | 184,984    |
| #3    | Kenya                                                                                                                                                                                                                                                                                                                                                                                                                                                                                                                                                                                                          | 23,142     |
| #4    | <b>#1 AND #2 AND #3</b>                                                                                                                                                                                                                                                                                                                                                                                                                                                                                                                                                                                        | <b>851</b> |

### Web of Science

| Query | Syntax                                                                                                                                                                                                                                                                                                                                                                                                                                                                                                       | Hits         |
|-------|--------------------------------------------------------------------------------------------------------------------------------------------------------------------------------------------------------------------------------------------------------------------------------------------------------------------------------------------------------------------------------------------------------------------------------------------------------------------------------------------------------------|--------------|
| #1    | Epidemiology OR Prevalence OR Seroprevalence OR Distribution OR Risk factors OR Seroepidemiology OR Surveillance                                                                                                                                                                                                                                                                                                                                                                                             | 6,092,854    |
| #2    | Vector-borne OR Arthropod-borne Virus* OR Mosquito-borne Virus* OR Aedes OR Culex OR Anopheles OR Tick-borne Virus* OR Arbovir* OR Yellow fever OR Rift Valley Fever Virus OR Dengue OR Chikungunya OR Zika OR West Nile Virus OR Crimean-Congo Hemorrhagic Fever OR Mayaro Virus* OR O'nyong' nyong OR O'nyong nyong OR Thogoto OR Nairobi Sheep Disease OR Tick-borne Encephalitis Virus* OR Bunyavir* OR Alphavir* OR Flavivir* OR Phlebovir* OR Nairovir* OR Togovir* OR Orthomyxovir* OR Orthobunyavir* | 128,595      |
| #3    | Kenya                                                                                                                                                                                                                                                                                                                                                                                                                                                                                                        | 91,533       |
| #4    | <b>#1 AND #2 AND #3</b>                                                                                                                                                                                                                                                                                                                                                                                                                                                                                      | <b>1,306</b> |
